# Supplementary material
Source: publisher figshare collection journal article supplement (https://frontiersin.figshare.com/ndownloader/files/10653793)
Supplement: Supplementary file [file 10653793]

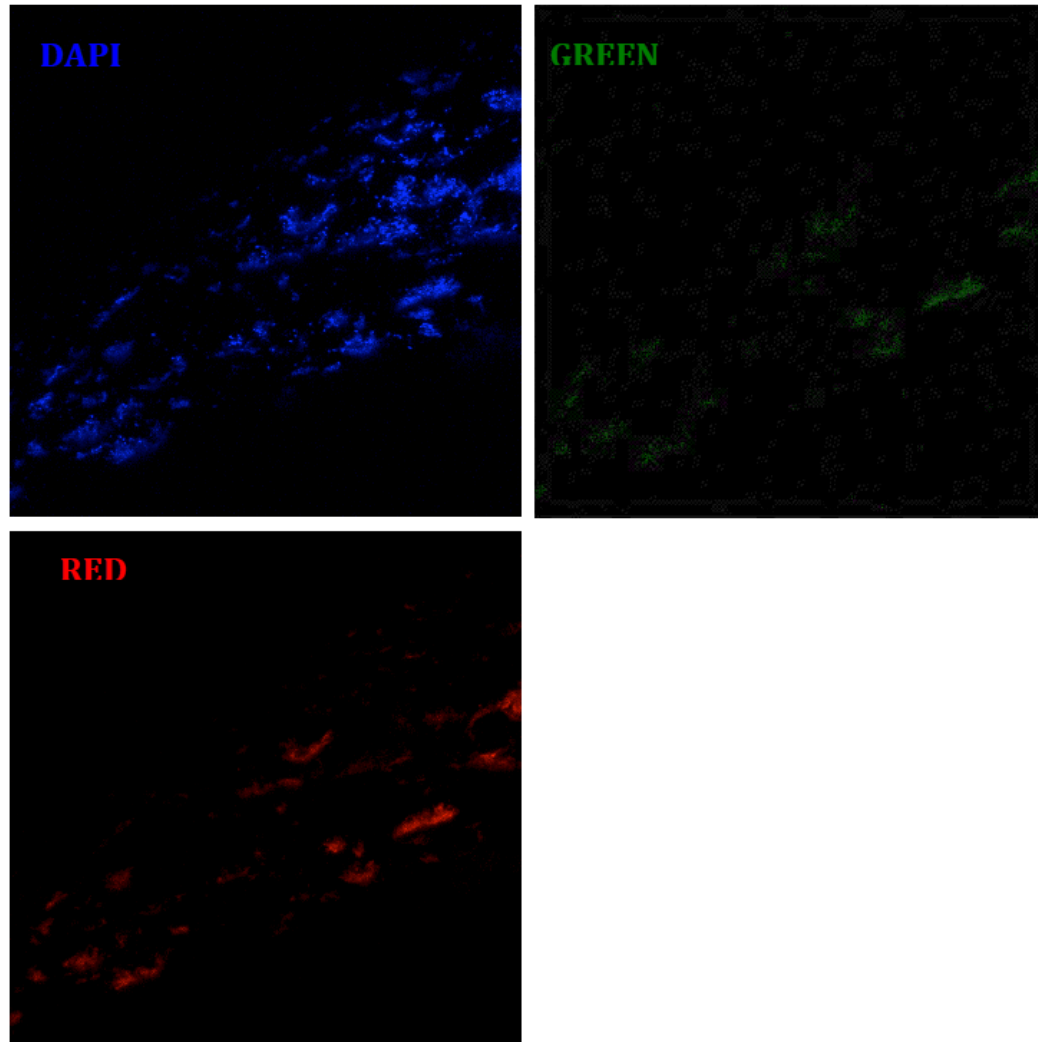

**Supplementary Figure 7: 1.** FISH experiments on the polarized particles of the ME-FBR. The blue signal corresponds to the DAPI stain (all nucleic acids), the red signal corresponds to the Eubacteria probe, the green one targets *Geobacter* cluster, while the white signal corresponds to the surface of the particle.
